# Supplementary material
Source: Springer Nature journal article supplement (https://www.springermedizin.de/resource/supplementary/13023_2011_311_MOESM1_ESM.pdf/9642084)

# Clinical endpoint, two trial timeline

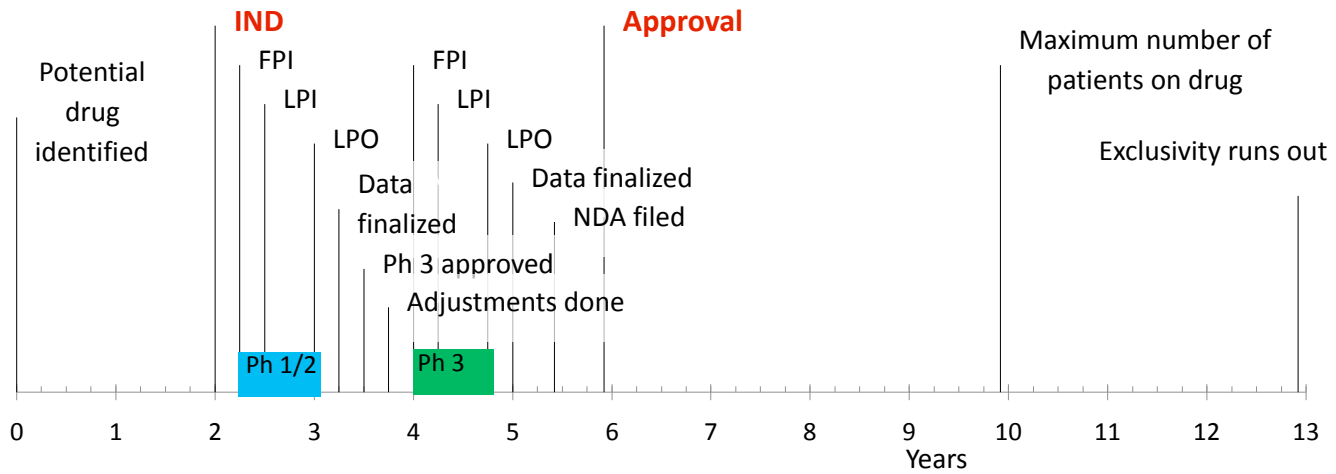

# Surrogate endpoint, two trial timeline

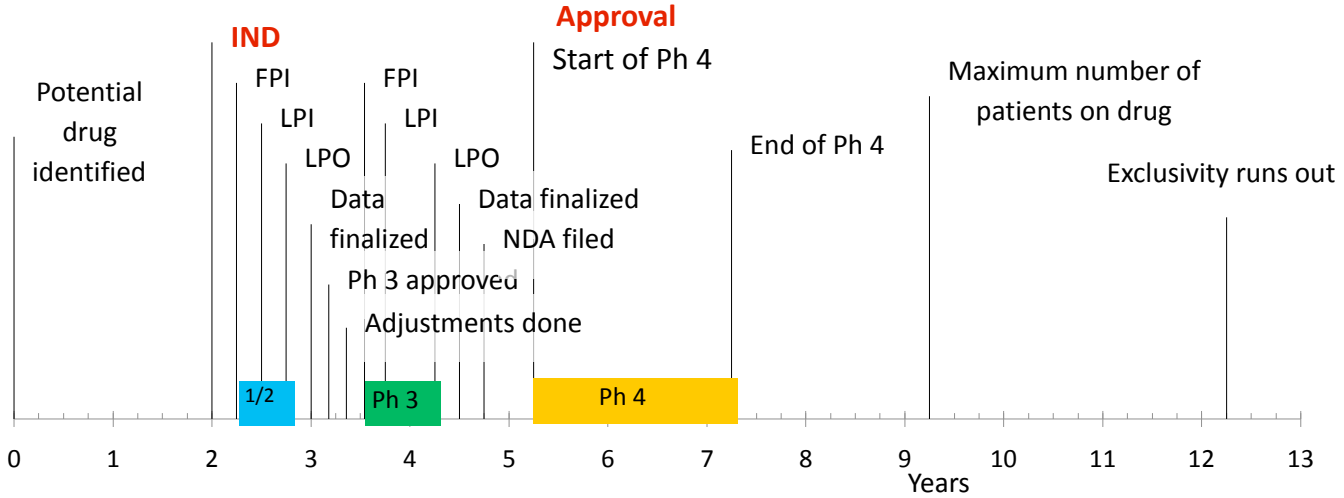

# Surrogate endpoint, one trial timeline

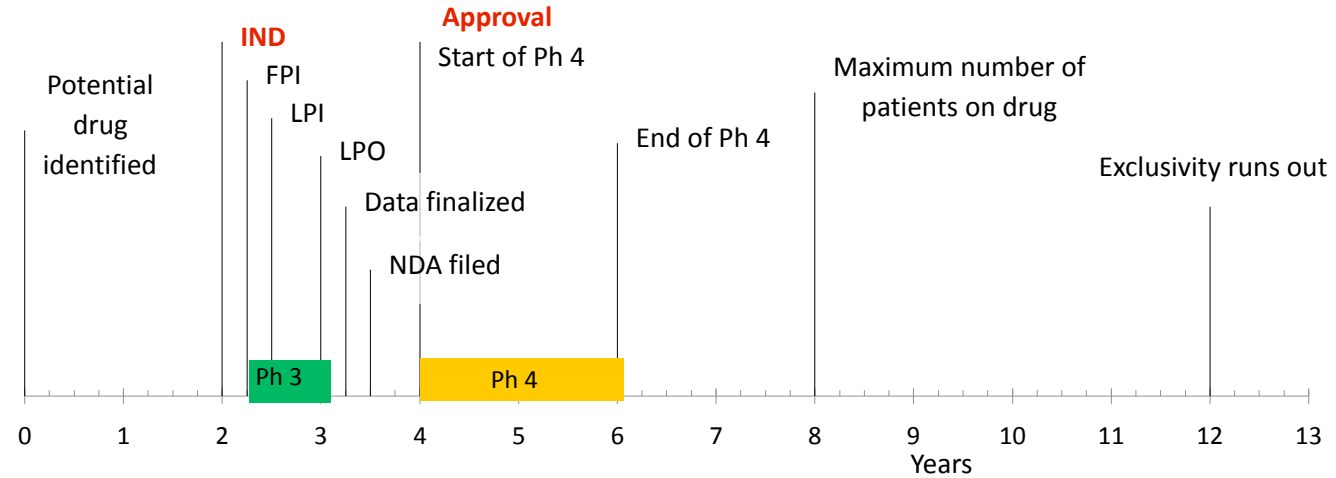

Supplement: MOESM1 [file 9642084]
